# Supplementary material
Source: Springer Nature journal article supplement (https://www.springermedizin.de/resource/supplementary/12879_2007_661_MOESM1_ESM.pdf/9449454)

## Device utilization rate

■ CVC ■ Port-type ■ Broviac/Hickman

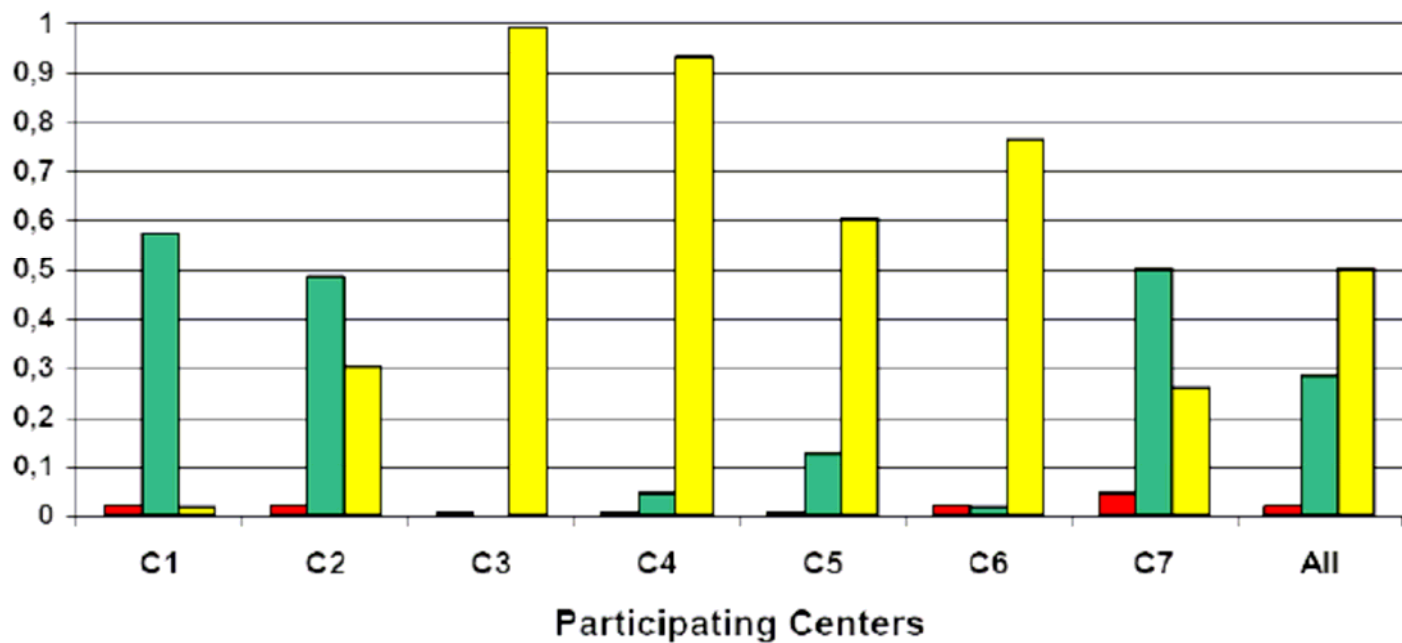

Supplement: MOESM1 [file 9449454]
